# Supplementary material for: MOFs as multifunctional catalysts: One-pot synthesis of menthol from citronellal over a bifunctional MIL-101 catalyst
Source: Royal Society of Chemistry journal article supplement (doi:10.1039/c2dt12480g), 2012-01-01
Supplement: c2dt12480g.pdf [file c2dt12480g.pdf]

## SUPPORTING INFORMATION

### A) Catalyst preparation

**Preparation of MIL-101:** Cr<sup>3+</sup>-MIL-101 was prepared according to the reported procedure.<sup>i</sup> Briefly, 500 mg of terephthalic acid and 800 mg Cr(NO<sub>3</sub>)<sub>3</sub>·9H<sub>2</sub>O were dissolved in 15 mL H<sub>2</sub>O and 40 μL HF (40%). The solution was placed inside an autoclave and kept at 200°C for 8h in an oven. The resulting material was recovered by filtration, washed with DMF and hot ethanol, and dry at RT in air.

**Preparation of Pd@MIL-101:** The preparation procedure for this material was adapted from that reported by Pan et al.<sup>ii</sup> Briefly, 500 mg of Cr<sup>3+</sup>-MIL-101 were dried under a vacuum at 120°C, and impregnated with 0.5 mL of an aqueous solution containing 10 mg mL<sup>-1</sup> of Pd(NO<sub>3</sub>)<sub>2</sub>·2H<sub>2</sub>O. The solid was then dried in air and heat treated up to 200°C under a N<sub>2</sub> atmosphere and kept at this temperature under a H<sub>2</sub> atmosphere for additional 2 h to reduce the palladium precursor. According to ICP, the Pd content of this samples was 0.28 wt% Pd.

### B) Catalytic tests

The citronellal isomerization reaction was performed at 80°C under a N<sub>2</sub> atmosphere. 60 μl of racemic citronellal and 30 mg of MOF was placed inside a round bottom flask with 0.5 ml of cyclohexane. The reaction was followed by GC-MS, using dodecane as external standard.

For the tandem isomerization/hydrogenation reaction, the N<sub>2</sub> atmosphere was replaced by a H<sub>2</sub> atmosphere ( $p(\text{H}_2) = 0.8 \text{ MPa}$ ). upon completion of the isomerization reaction.

### C) Textural properties of the catalysts

**Table S1**

| Sample                       | S <sub>BET</sub> (m <sup>2</sup> g <sup>-1</sup> ) | V <sub>p</sub> (cm <sup>3</sup> g <sup>-1</sup> ) |
|------------------------------|----------------------------------------------------|---------------------------------------------------|
| Cr <sup>3+</sup> -MIL-101    | 2336                                               | 1.40                                              |
| Pd@MIL-101                   | 2182                                               | 0.97                                              |
| Pd@MIL-101 used <sup>a</sup> | 1619                                               | 0.72                                              |

<sup>a</sup> Material recovered after one catalytic cycle (tandem one-pot two steps isomerization/hydrogenation of citronellal to menthol at 80°C and  $p(\text{H}_2)=0.8 \text{ MPa}$ ).

### D) XRD analysis

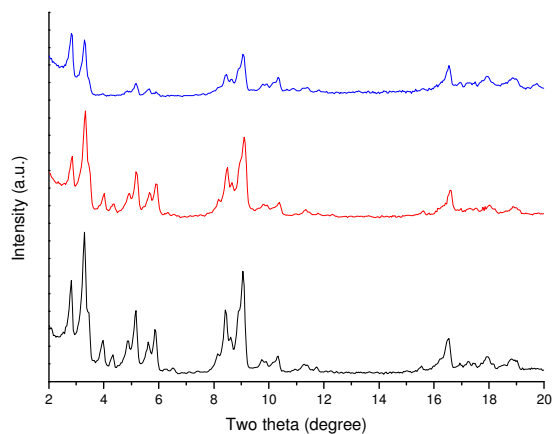

**Fig. S1.** XRD patterns (Cu K $\alpha$  radiation) of MIL-101 (black), Pd/MIL-101 before the reaction (red) and Pd/MIL-101 after the reaction (blue).

### E) TEM analysis

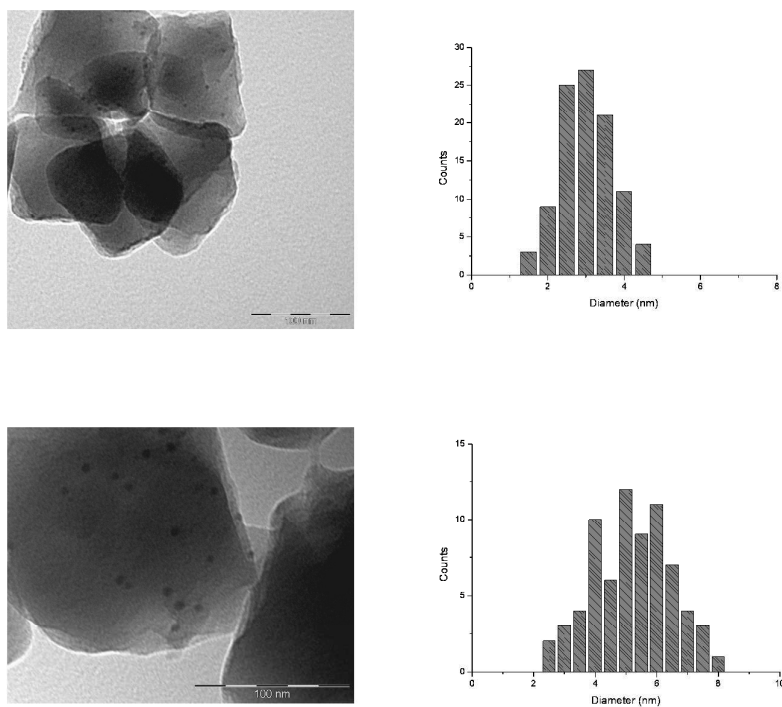

**Fig. S2.** TEM images and particle size distributions of (top) fresh and (bottom) used Pd@MIL-101.

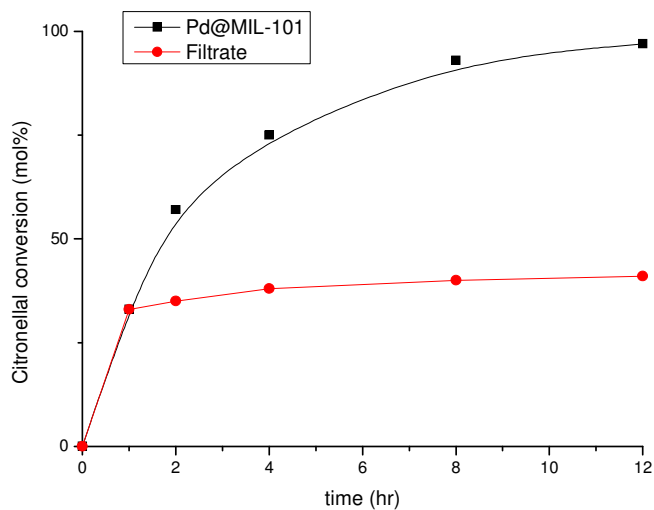

**Fig. S3.** Hot filtration test. Black curve: Conversion of citronella over Pd@MIL-101. Red curve: The reaction was carried out in the presence of Pd@MIL-101 for 1 hr. Then the catalysts was removed by filtration at the reaction temperature and the reaction was followed in the filtrate at the same temperature.

<sup>i</sup> G. Ferey, C. Mellot-Draznieks, C. Serre, F. Millange, J. Dutour, S. Surble and I. Margiolaki, *Science*, 2005, **309**, 2040-2042.

<sup>ii</sup> Y. Pan, B. Yuan, Y. Li and D. He, *Chem. Commun.*, 2010, **46**, 2280-2282.
